# Supplementary material
Source: publisher figshare collection journal article supplement (https://karger.figshare.com/ndownloader/files/30894496)

**Supplementary Table 1.** Search strategy

Medline, November 2020

1     Carotid Intima-Media Thickness/ or "carotid intima-media thickness".ab,ti. (8922)

2     Tunica Media/ or Tunica Intima/ (12243)

3     imt.ab,ti. (8083)

4     1 or 2 or 3 (22845)

5     exp Dementia/ (169002)

6     exp Hydrocephalus, Normal Pressure/ (2306)

7     (Hydrocephalus adj3 Normal Pressure).mp. (3199)

8     exp Cognitive Dysfunction/ (19267)

9     Cognition Disorders/ (64526)

10     alzheimer*.mp. [mp=title, abstract, original title, name of substance word, subject heading word, floating

sub-heading word, keyword heading word, organism supplementary concept word, protocol supplementary concept word, rare disease supplementary concept word, unique identifier, synonyms] (164831)

11     hakim.ab,ti. (332)

12     "cognit*".ab,ti. (403958)

13     (Mental Status and Dementia Tests).mp. [mp=title, abstract, original title, name of substance word, subject

heading word, floating sub-heading word, keyword heading word, organism supplementary concept word, protocol supplementary concept word, rare disease supplementary concept word, unique identifier, synonyms] (1692)

14     5 or 6 or 7 or 8 or 9 or 10 or 11 or 12 or 13 (590736)

15     4 and 14 (276)

16     limit 15 to english language (269)

Embase, November 2020


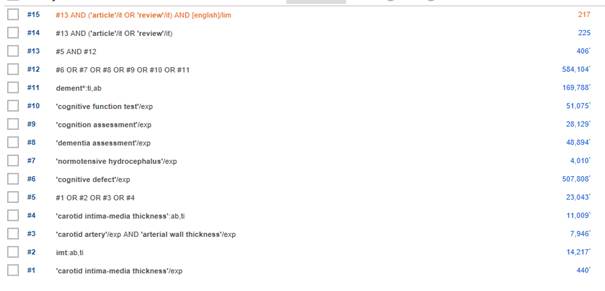

Supplement: Supplementary file 1 [file 30894496]
